# Supplementary material for: Death associated protein kinase 2 suppresses T-B interactions and GC formation
Source: PubMed Central journal article supplement (PMC7754787; doi:10.1016/j.molimm.2020.10.018), 2020-12

# Fig S2

A

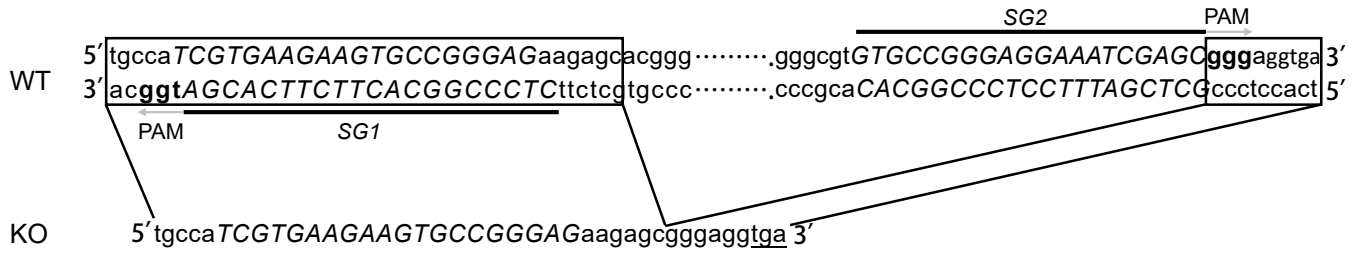

B

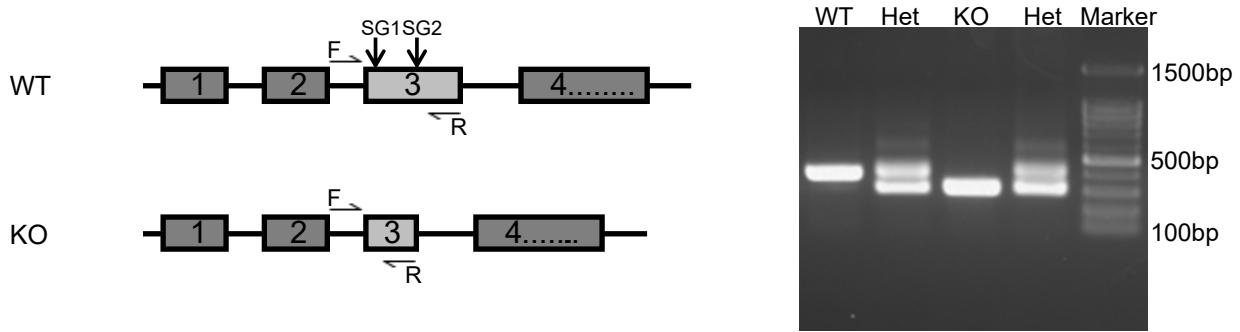

C

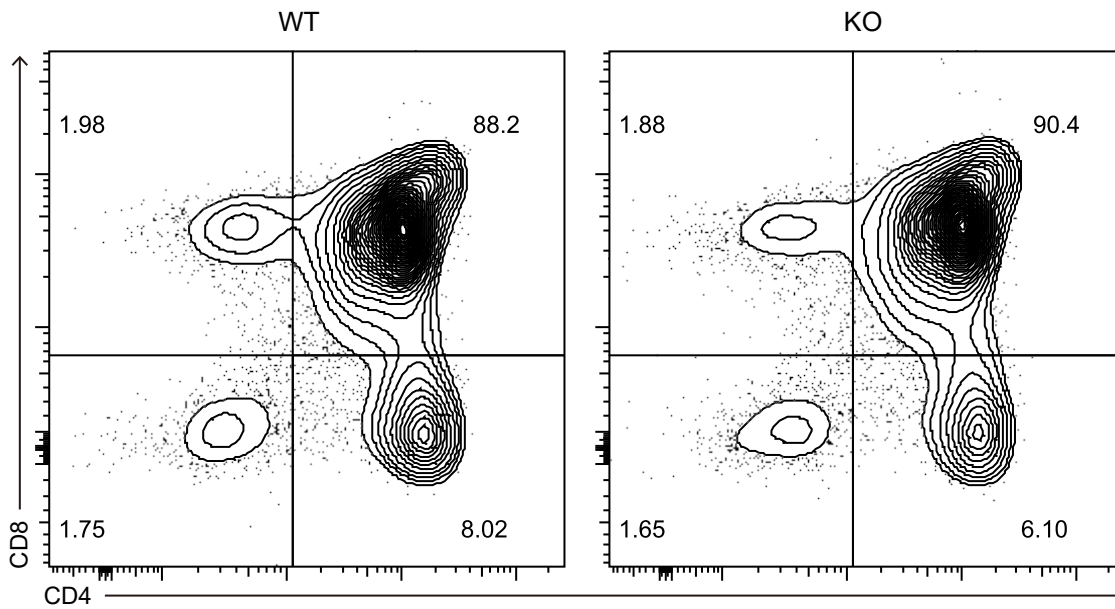

Supplement: mmc2.pdf [file mmc2.pdf]
